# Supplementary material for: PLK1 and PARP positively correlate in Middle Eastern breast cancer and their combined inhibition overcomes PARP inhibitor resistance in triple negative breast cancer
Source: Frontiers journal article supplement (doi:10.3389/fonc.2023.1286585), 2024-01-03
Supplement: Data_Sheet_1.PDF [file Data_Sheet_1.PDF]

## Supplementary materials

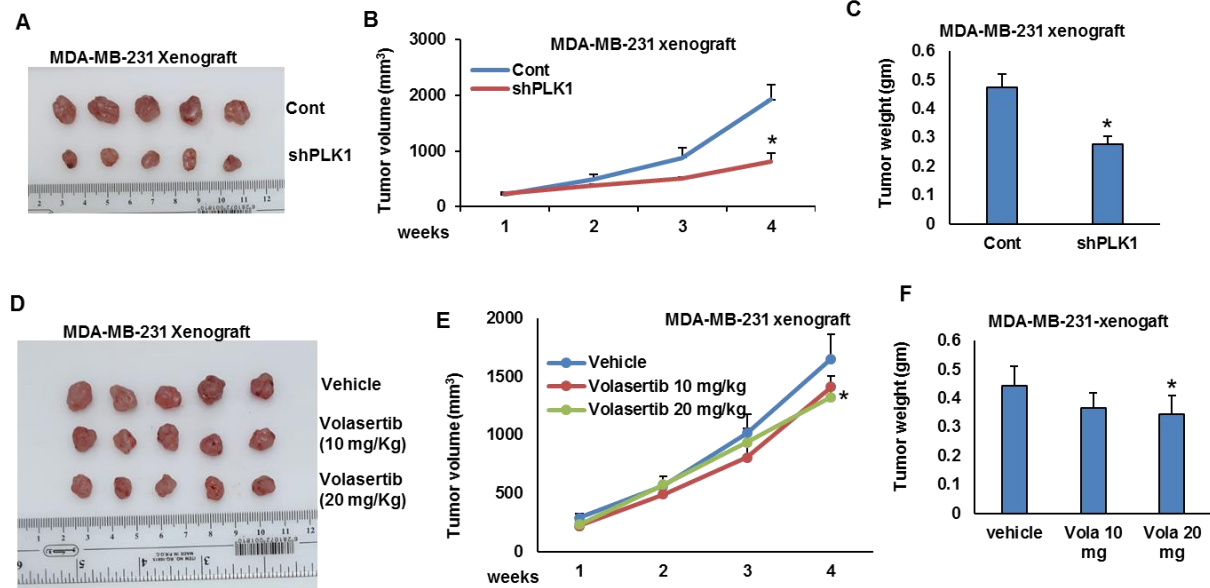

**Supplementary Figure 1.** Inhibition of PLK1 delays TNBC tumor growth in vivo. (A-C) Knockdown of PLK1 in MDA-MB-231 cells delayed tumor growth in vivo. PLK1 knockdown MDA-MB-231 cells and their control cells were subcutaneously injected into the flanks of 6-week old nude mice ( $4 \times 10^6$  cells per mouse). (B) The volume of each tumor was measured every week. The average ( $n = 5$ ) tumor volume ( $\pm$  SD) in each group of mice was calculated, \* $p < 0.05$ . (C) After four weeks, mice were sacrificed and mean tumor weight ( $\pm$  SD) was calculated in each group, \* $p < 0.05$ . (D-F) Volasertib inhibits TNBC tumor growth in vivo. MDA-MB-231 cells were subcutaneously injected into the flanks of 6-week old nude mice ( $4 \times 10^6$  cells per mouse). After tumors grew to about 100 mm<sup>3</sup>, mice were treated intraperitoneally with indicated dose of volasertib, twice a week for 30 days. (D) Representative tumor images of each group of mice. (E) The volume of each tumor was measured every week. The average ( $n = 5$ ) tumor volume ( $\pm$  SD) in each group of mice was calculated, \* $p < 0.05$ . (F) After four weeks treatment, mice were sacrificed and mean tumor weight ( $\pm$  SD) was calculated in each group, \* $p < 0.05$ .

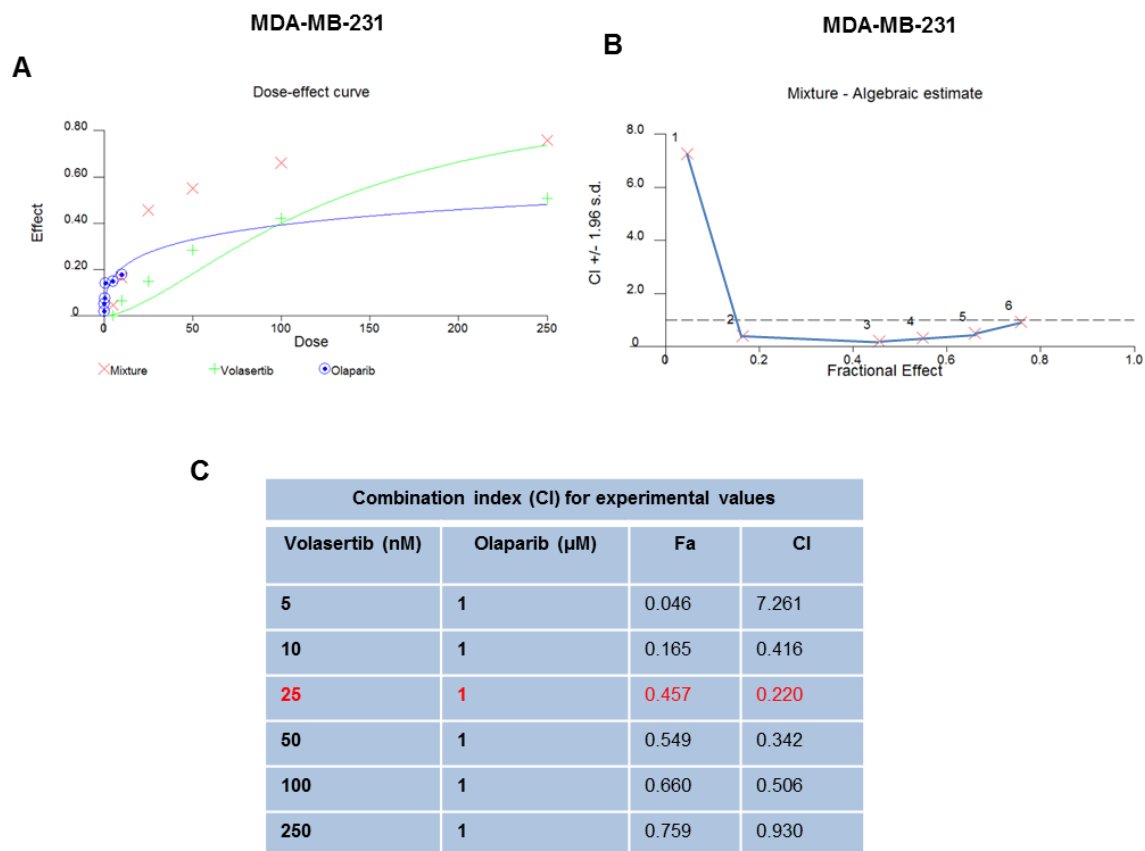

**Supplementary Figure 2.** Synergistic inhibition of cell viability by olaparib and volasertib in MDA-MB-231 cells. MDA-MB-231 cells were treated with various combinations of volasertib and olaparib for 48 h and dose effect (A) and Fractional effect (B) graphs were generated using Calcsyn software. (C) Combination Index (CI) were calculated using Chou and Talalay method.

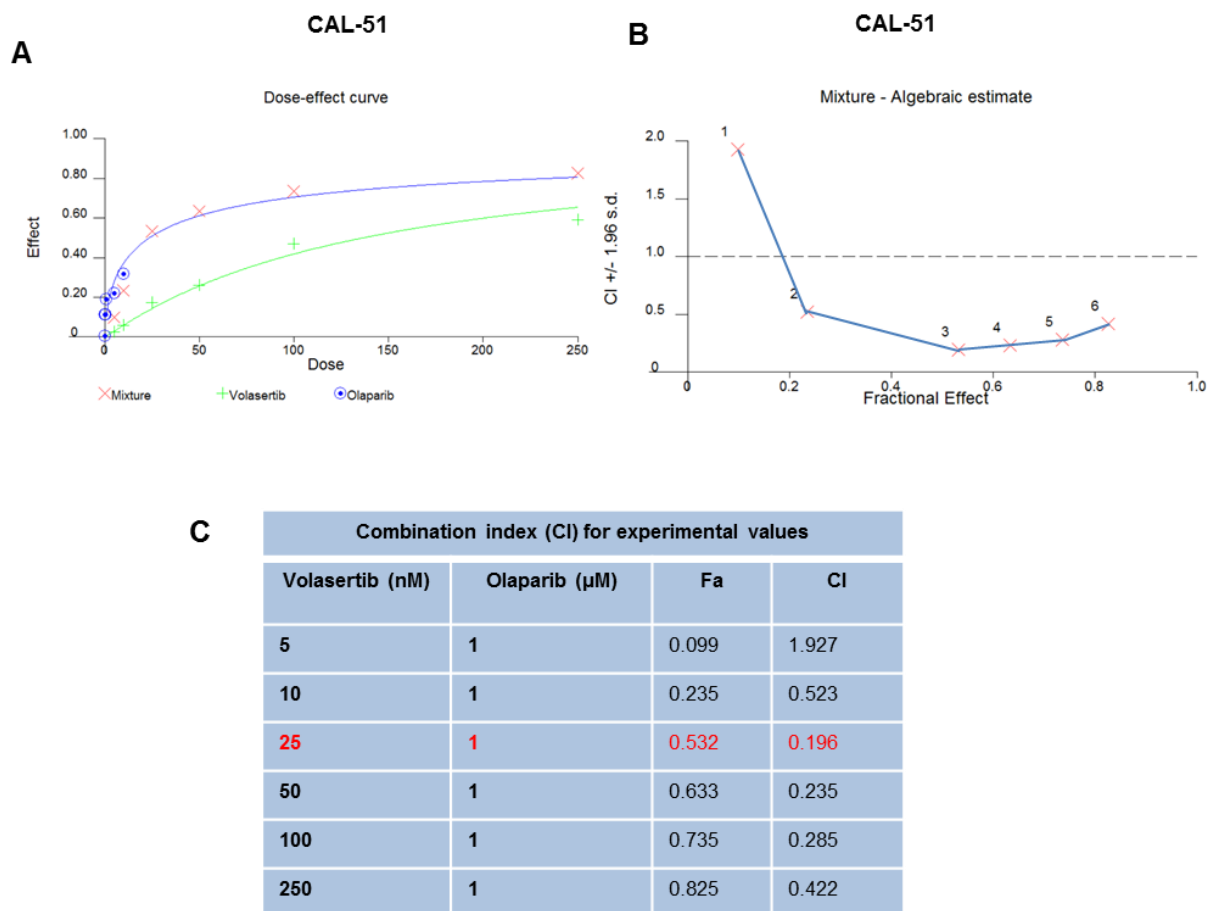

**Supplementary Figure 3.** Synergistic inhibition of cell viability by olaparib and volasertib in CAL-51 cells. CAL-51 cells were treated with various combinations of volasertib and olaparib for 48 h and dose effect (A) and Fractional effect (B) graphs were generated using Calcosyn software. (C) Combination Index (CI) were calculated using Chou and Talalay method.

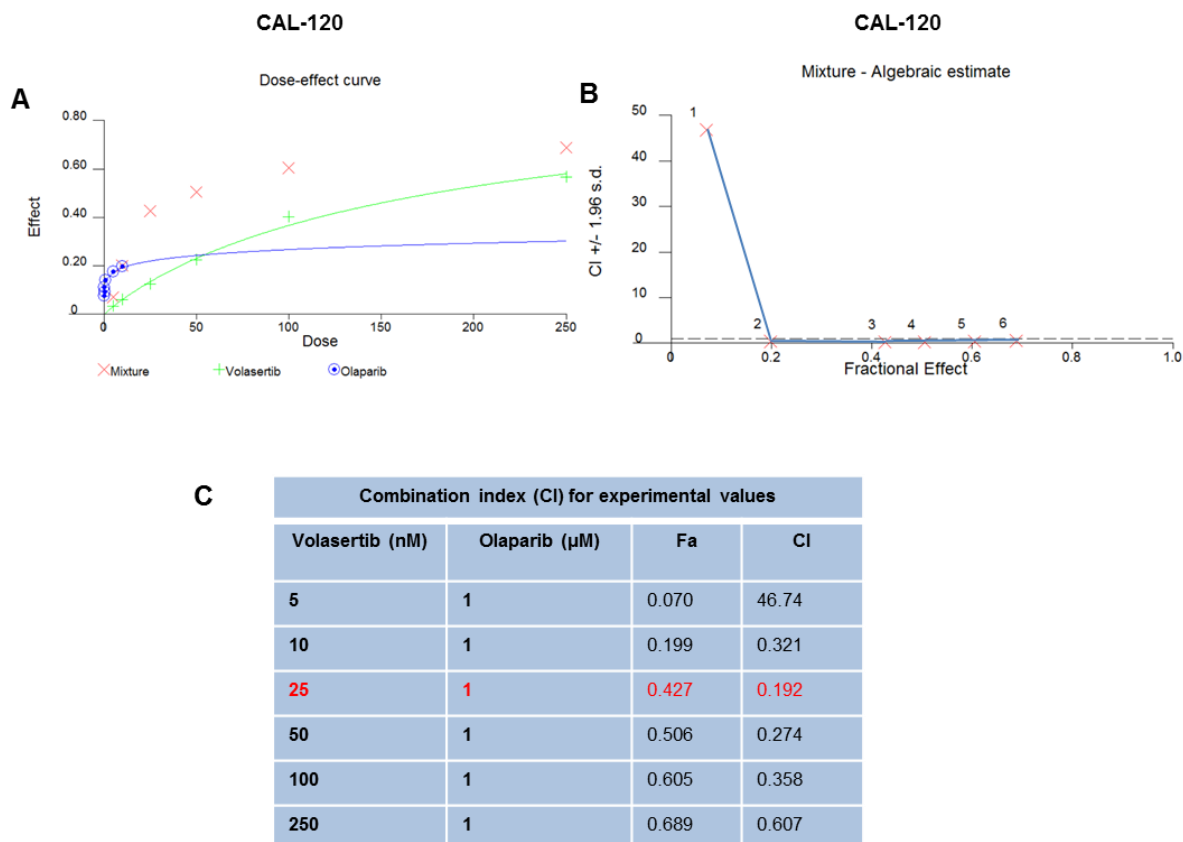

**Supplementary Figure 4.** Synergistic inhibition of cell viability by olaparib and volasertib in CAL-120 cells. Cal-120 cells were treated with various combinations of volasertib and olaparib for 48 h and dose effect (A) and Fractional effect (B) graphs were generated using Calcosyn software. (C) Combination Index (CI) were calculated using Chou and Talalay method.
